# Supplementary material for: Quantitative Proteomics of the Infectious and Replicative Forms of Chlamydia trachomatis
Source: PubMed Central journal article supplement (PMC4752267; doi:10.1371/journal.pone.0149011), 2016-02-12
Supplement: pone.0149011.s008.pdf [file pone.0149011.s008.pdf]

| <b>L2 locus</b> | <b>Protein description</b>                |
|-----------------|-------------------------------------------|
| CTL0161         | Conserved hypothetical protein            |
| CTL0228         | Fumarate hydratase (FumC)                 |
| CTL0292         | Conserved hypothetical protein            |
| CTL0409         | Phospholipase D protein                   |
| CTL0414         | Phospholipase D protein                   |
| CTL0415         | Conserved hypothetical protein            |
| CTL0418         | Putative membrane protein                 |
| CTL0420         | Cytotoxin (adherence)                     |
| CTL0421         | Cytotoxin (adherence)                     |
| CTL0426A        | Conserved hypothetical protein            |
| CTL0552         | Putative integral membrane protein        |
| CTL0578         | Conserved hypothetical protein            |
| CTL0612         | Inner membrane protein                    |
| CTL0627         | Pyruvoyl-dependent arginine decarboxylase |
| CTL0856         | Succinate dehydrogenase (sdhC)            |
